# Supplementary material
Source: ML conference proceedings conference paper supplement (https://openaccess.thecvf.com/content/ICCV2021/html/Li_CoMatch_Semi-Supervised_Learning_ICCV_2021_paper.html)
Supplement: Supplementary file 1 [file Li_CoMatch_Semi-Supervised_Learning_ICCV_2021_supplemental.pdf]

## Appendix A. Experiment Details

In Table 5, we show the complete set of hyperparameters in our semi-supervised learning experiments.

| Dataset             | $B$ | $\mu$ | $\lambda_{cls}$ | $\alpha$ | $K$   | $t$ | $\tau$ | $T$ | $\lambda_{ctr}$ |
|---------------------|-----|-------|-----------------|----------|-------|-----|--------|-----|-----------------|
| CIFAR-10            | 64  | 7     | 1               | 0.9      | 2560  | 0.2 | 0.95   | 0.8 | 1               |
| STL-10              |     |       |                 |          |       |     |        |     | 5               |
| ImageNet 1% labels  | 160 | 4     | 10              | 0.9      | 30000 | 0.1 | 0.6    | 0.3 | 10              |
| ImageNet 10% labels |     |       |                 |          |       |     | 0.5    | 0.2 | 2               |

Table 5: Hyperparameters for CoMatch in the semi-supervised learning experiments.

The strong augmentation  $\text{Aug}_s$  on ImageNet unlabeled data uses color distortion in addition to the standard crop-and-flip. A pseudo-code for the color distortion in PyTorch is as follows:

```
from torchvision import transforms as T
color_jitter = T.ColorJitter(0.4, 0.4, 0.4, 0.1)
transforms.Compose([
    T.RandomApply([color_jitter], p=0.8)
    T.RandomGrayscale(p=0.2)])
```

## Appendix B. MB and MQ in CoMatch

Figure 5 illustrates how the EMA model is utilized in CoMatch to construct the memory bank (MB) and the momentum queue (MQ). The memory bank contains the class probability and the low-dimensional embeddings for both weakly-augmented labeled samples and weakly-augmented unlabeled samples. The momentum queue contains the pseudo-labels for the unlabeled samples and their strongly-augmented embeddings.

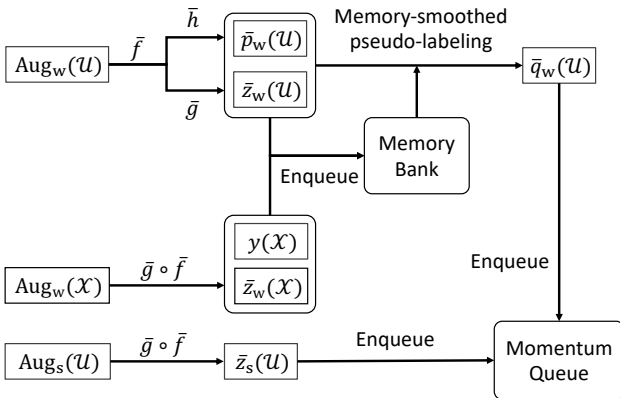

Figure 5: Illustration of the memory bank and the momentum queue.  $\mathcal{U}$  is the batch of unlabeled data,  $\mathcal{X}$  is the batch of labeled data.  $\tilde{f}$ ,  $\tilde{h}$ , and  $\tilde{g}$  refer to the EMA version of the encoder, the classification head, and the projection head, respectively.

## Appendix C. Pseudo-code of CoMatch

Algorithm 1 presents the pseudo-code of CoMatch.

Algorithm 1: Pseudo-code of CoMatch (one iteration).

```
1 Input: labeled batch  $\mathcal{X} = \{(x_b, y_b)\}_{b=1}^B$ , unlabeled batch
    $\mathcal{U} = \{u_b\}_{b=1}^{\mu B}$ , encoder  $f$ , classifier  $h$ , projection head  $g$ ,
   memory bank  $\text{MB} = \{(p_k^w, z_k^w)\}_{k=1}^K$ .
2 for  $b \in \{1, \dots, \mu B\}$  do
   // class probability prediction
3    $p_b^w = h \circ f(\text{Aug}_w(u_b))$ 
   // distribution alignment
4    $p_b^w = \text{DA}(p_b^w)$ 
   // weakly-augmented embedding
5    $z_b^w = g \circ f(\text{Aug}_w(u_b))$ 
   // memory-smoothed pseudo-labeling
6   for  $k \in \{1, \dots, K\}$  do
7      $a_k = \frac{\exp(z_b^w \cdot z_k^w / t)}{\sum_{k=1}^K \exp(z_b^w \cdot z_k^w / t)}$  // affinity
8   end
9    $q_b = \alpha p_b^w + (1 - \alpha) \sum_{k=1}^K a_k p_k^w$ 
   // strongly-augmented embeddings
10   $z_b = g \circ f(\text{Aug}_s(u_b))$ 
11   $z'_b = g \circ f(\text{Aug}'_s(u_b))$ 
12 end
13 for  $b \in \{1, \dots, \mu B\}$  do
14   for  $j \in \{1, \dots, \mu B\}$  do
   // pseudo-label graph
15    $W_{bj}^q = \begin{cases} 1 & \text{if } b = j \\ q_b \cdot q_j & \text{if } b \neq j \text{ and } q_b \cdot q_j \geq T \\ 0 & \text{otherwise} \end{cases}$ 
   // embedding graph
16    $W_{bj}^z = \begin{cases} \exp(z_b \cdot z'_j / t) & \text{if } b = j \\ \exp(z_b \cdot z_j / t) & \text{if } b \neq j \end{cases}$ 
17   end
18    $\hat{W}^q = \text{Normalize}(W^q)$ 
19    $\hat{W}^z = \text{Normalize}(W^z)$ 
20 end
   // losses
21  $\mathcal{L}_x = \frac{1}{B} \sum_{b=1}^B \text{H}(y_b, p(y | \text{Aug}_w(x_b)))$ 
22  $\mathcal{L}_u^{cls} = \frac{1}{\mu B} \sum_{b=1}^{\mu B} \mathbb{1}(\max q_b \geq \tau) \text{H}(q_b, p(y | \text{Aug}_s(u_b)))$ 
23  $\mathcal{L}_u^{ctr} = \frac{1}{\mu B} \sum_{b=1}^{\mu B} \text{H}(\hat{W}_b^q, \hat{W}_b^z)$ 
24  $\mathcal{L} = \mathcal{L}_x + \lambda_{cls} \mathcal{L}_u^{cls} + \lambda_{ctr} \mathcal{L}_u^{ctr}$ 
25 update  $f, h, g$  with SGD to minimize  $\mathcal{L}$ .
```
